# Supplementary material
Source: PubMed Central journal article supplement (PMC4122263)
Supplement: NIHMS609504-supplement-supplement_1.pdf [file NIHMS609504-supplement-supplement_1.pdf]

**Table S1. Association between ADH1B (rs1229984), ALDH2 (rs671), and drinking intensity in ever drinkers expressed as mean of ml of ethanol consumed per week.**

|                          | All |        |               | Controls |        |               | Cases |        |               |
|--------------------------|-----|--------|---------------|----------|--------|---------------|-------|--------|---------------|
|                          | n   | mean*  | 95% CI        | n        | mean   | 95% CI        | n     | mean   | 95% CI        |
| <b>ADH1B (rs1229984)</b> |     |        |               |          |        |               |       |        |               |
| A/A (fast)               | 507 | 541.37 | 483.92-598.81 | 276      | 493.01 | 441.42-544.60 | 231   | 601.32 | 492.62-710.01 |
| A/G                      | 420 | 573.07 | 509.92-636.23 | 233      | 521.97 | 465.95-577.99 | 187   | 627.29 | 506.15-748.43 |
| G/G (slow)               | 157 | 620.01 | 516.56-723.47 | 64       | 587.12 | 479.99-694.25 | 93    | 656.29 | 484.38-828.20 |
| <i>P</i> for trend       |     |        | 0.0327        |          |        | 0.0351        |       |        | 0.5003        |
| <b>ADH1C (rs698)</b>     |     |        |               |          |        |               |       |        |               |
| A/A (fast)               | 908 | 571.18 | 528.40-613.96 | 472      | 520.83 | 481.48-560.17 | 436   | 628.42 | 549.62-707.22 |
| A/G                      | 166 | 541.00 | 440.79-641.22 | 95       | 506.86 | 419.00-594.72 | 71    | 567.57 | 371.74-763.40 |
| G/G (slow)               | 14  | 514.74 | 169.66-859.83 | 6        | 329.01 | -20.85-678.87 | 8     | 674.56 | 88.81-1260.31 |
| <i>P</i> for trend       |     |        | 0.5224        |          |        | 0.9759        |       |        | 0.4036        |
| <b>ALDH2 (rs671)</b>     |     |        |               |          |        |               |       |        |               |
| G/G (fast)               | 817 | 602.61 | 557.58-647.64 | 450      | 561.02 | 521.33-600.70 | 367   | 648.94 | 562.53-735.36 |
| A/G                      | 254 | 461.82 | 380.64-543.01 | 119      | 367.38 | 290.00-444.75 | 135   | 554.28 | 410.40-698.16 |
| A/A (slow)               | 20  | 430.87 | 140.80-720.94 | 8        | 272.90 | -30.36-576.16 | 12    | 575.53 | 97.26-1053.79 |
| <i>P</i> for trend       |     |        | <0.001        |          |        | <0.001        |       |        | 0.2228        |

Mean of ml ethanol per week was derived from ANOVA with adjustment on age, gender, study area, smoking pack-years, and case/control status (when appropriate).

*P* for trend was derived from linear regression with log(ml of ethanol per week) as outcome using a log-additive genetic model.

**Table S2. Association between ADH1B (rs1229984), ALDH2 (rs671), and drinking intensity in ever drinkers expressed as mean of ml of ethanol consumed per week, stratified on alcohol drinking intensity.**

|                                              | All |        |                | Controls |        |               | Cases |        |                |
|----------------------------------------------|-----|--------|----------------|----------|--------|---------------|-------|--------|----------------|
|                                              | n   | mean   | 95% CI         | n        | mean   | 95% CI        | n     | mean   | 95% CI         |
| <b><u>Light Drinkers (&lt; 250ml/wk)</u></b> |     |        |                |          |        |               |       |        |                |
| <b>ADH1B (rs1229984)</b>                     |     |        |                |          |        |               |       |        |                |
| A/A (fast)                                   | 113 | 122.60 | 112.49-132.71  | 77       | 126.43 | 113.48-139.38 | 36    | 113.99 | 97.77-130.21   |
| A/G                                          | 96  | 136.97 | 125.97-147.96  | 63       | 142.99 | 128.69-157.30 | 33    | 126.25 | 109.16-143.34  |
| G/G (slow)                                   | 24  | 141.53 | 119.52-163.55  | 18       | 145.12 | 118.41-171.83 | 6     | 128.98 | 87.79-170.17   |
| <i>P</i> for trend                           |     |        | 0.0154         |          |        | 0.0420        |       |        | 0.2213         |
| <b>ADH1C (rs698)</b>                         |     |        |                |          |        |               |       |        |                |
| A/A (fast)                                   | 194 | 126.66 | 119.08-134.25  | 123      | 129.83 | 119.92-139.75 | 71    | 119.29 | 107.82-130.76  |
| A/G                                          | 37  | 152.44 | 134.88-170.01  | 32       | 160.13 | 140.68-179.59 | 5     | 126.81 | 83.05-170.56   |
| G/G (slow)                                   | 2   | 100.65 | 24.64-176.65   | 2        | 108.64 | 28.14-189.15  | 0     |        |                |
| <i>P</i> for trend                           |     |        | 0.0276         |          |        | 0.0223        |       |        | 0.7595         |
| <b>ALDH2 (rs671)</b>                         |     |        |                |          |        |               |       |        |                |
| G/G (fast)                                   | 171 | 131.51 | 123.21-139.84  | 114      | 137.86 | 127.18-148.54 | 57    | 117.75 | 104.98-130.52  |
| A/G                                          | 57  | 125.84 | 111.28-140.40  | 42       | 126.65 | 108.93-144.38 | 15    | 128.07 | 102.51-153.63  |
| A/A (slow)                                   | 4   | 100.79 | 45.39-156.18   | 2        | 143.19 | 60.19-226.20  | 2     | 55.01  | -13.87-123.90  |
| <i>P</i> for trend                           |     |        | 0.2763         |          |        | 0.4912        |       |        | 0.3290         |
| <b><u>Moderate/heavy (≥ 250ml/wk)</u></b>    |     |        |                |          |        |               |       |        |                |
| <b>ADH1B (rs1229984)</b>                     |     |        |                |          |        |               |       |        |                |
| A/A (fast)                                   | 394 | 655.96 | 585.48-726.45  | 199      | 630.11 | 566.81-693.42 | 195   | 689.56 | 564.07-815.05  |
| A/G                                          | 324 | 701.19 | 623.37-779.02  | 170      | 664.49 | 596.14-732.83 | 154   | 727.81 | 586.05-869.58  |
| G/G (slow)                                   | 133 | 725.34 | 603.73-846.96  | 46       | 772.91 | 641.82-903.89 | 87    | 708.62 | 520.30-896.94  |
| <i>P</i> for trend                           |     |        | 0.2713         |          |        | 0.0171        |       |        | 0.4245         |
| <b>ADH1C (rs698)</b>                         |     |        |                |          |        |               |       |        |                |
| A/A (fast)                                   | 714 | 691.89 | 639.85-743.94  | 349      | 660.27 | 612.85-707.69 | 365   | 722.55 | 631.30-813.80  |
| A/G                                          | 129 | 647.79 | 525.03-770.56  | 63       | 668.43 | 556.55-780.32 | 66    | 623.44 | 408.10-838.79  |
| G/G (slow)                                   | 12  | 637.40 | 235.46-1039.34 | 4        | 525.15 | 81.10-969.19  | 8     | 712.83 | 92.12-1333.53  |
| <i>P</i> for trend                           |     |        | 0.7450         |          |        | 0.8408        |       |        | 0.4560         |
| <b>ALDH2 (rs671)</b>                         |     |        |                |          |        |               |       |        |                |
| G/G (fast)                                   | 646 | 720.44 | 665.71-775.16  | 336      | 701.26 | 653.62-748.90 | 310   | 737.73 | 638.08-837.38  |
| A/G                                          | 197 | 578.06 | 478.04-678.09  | 77       | 509.39 | 409.33-609.44 | 120   | 628.64 | 466.78-790.50  |
| A/A (slow)                                   | 16  | 556.78 | 207.59-905.97  | 6        | 365.03 | 2.89-727.18   | 10    | 702.11 | 148.15-1256.06 |
| <i>P</i> for trend                           |     |        | 0.0002         |          |        | <0.001        |       |        | 0.2009         |

Mean of ml ethanol per week was derived from ANOVA with adjustment on age, gender, study area, smoking pack-years, and case/control status (when appropriate).

*P* for trend was derived from linear regression with log(ml of ethanol per week) as outcome using a log-additive genetic model.
